# Supplementary material
Source: Springer Nature journal article supplement (https://www.springermedizin.de/resource/supplementary/12986_2007_135_MOESM2_ESM.pdf/25655438)

# EXFS

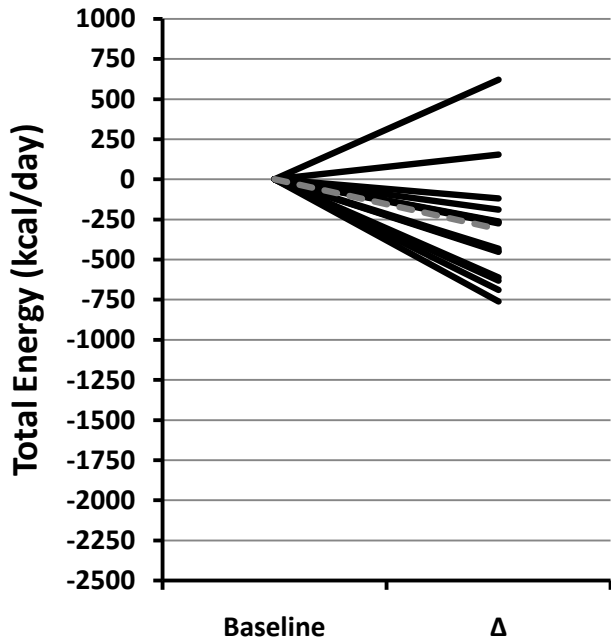

# EX

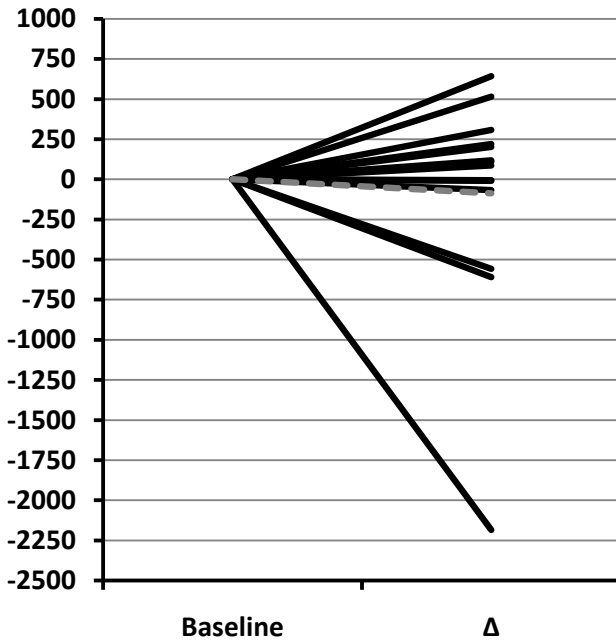

# CON

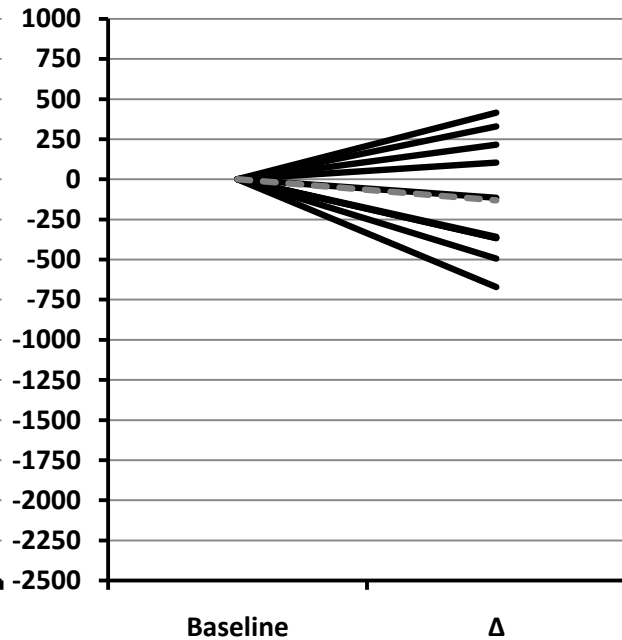

Supplement: MOESM2 [file 25655438]
